# Supplementary material for: V-ATPase-associated prorenin receptor is upregulated in prostate cancer after PTEN loss
Source: PubMed Central journal article supplement (PMC6697641; doi:10.18632/oncotarget.27075), 2019-08-13
Supplement: oncotarget-10-4923-s001.pdf [file oncotarget-10-4923-s001.pdf]

# V-ATPase-associated prorenin receptor is upregulated in prostate cancer after PTEN loss

## SUPPLEMENTARY MATERIALS

### 2D-difference gel electrophoresis (DiGE)

A pooled internal standard, consisting of 25 µg of protein of each replicate was labelled with Cy2. Experimental samples were combined along with the pooled internal standard, 4.5 µL of 1% immobilized pH gradient (IPG) buffer (GE Healthcare), 5.4 µL of DeStreak Reagent (GE Healthcare), and rehydration buffer (7M Urea, 2M Thiourea, 4% CHAPS, 0.002% Bromophenol blue). Samples were then loaded onto 24 cm pH 3-11 non-linear Immobiline DryStrips (GE Healthcare). Active rehydration and isoelectric focusing (IEF) were performed using the Ettan IPGphor IEF system (GE Healthcare). Immediately following IEF, the IPG strips were equilibrated in equilibration buffer (100 mM Tris, 6M Urea, 30% Glycerol, 2% SDS, 0.002% Bromophenol blue), first in buffer containing 5 mg/mL DTT, then in equilibration containing 45mg/mL iodoacetamide. IPG strips were loaded onto 12.5% SDS-PAGE gels and sealed in place using 1% agarose.

### Tissue microarrays (TMAs) immunohistochemistry

Tissue sections of 4µm from TMAs were deparaffinized, rehydrated and incubated in a methanol/0.3% H<sub>2</sub>O<sub>2</sub> solution. Immunostaining for phosphorylated Akt was performed as in mice tissues (below). Immunostaining for PRR, SPON-2, and CST3 was performed using a XT autostainer (Ventana Medical System Inc.). Antigen retrieval was obtained using Cell Conditioning 1 (Ventana Medical System Inc.) for 60min. Antibody dilutions (PRR: Genetex, 1: 100; SPON-2: R&D System, 1:500; CST3: R&D System, 1:500) were manually added to the slides and incubated at 37° C for 60 minutes. Reactions for PRR were developed using the UltraView universal DAB detection kit (Ventana Medical System Inc.). For SPON-2 and CST3 IHCs, however, pre-diluted anti-goat secondary antibody (Santa-Cruz) was automatically dispensed and reactions were developed using the iView DAB detection kit without secondary antibody (Ventana Medical System Inc.). Counterstaining was performed with Hematoxylin and bluing reagent (Ventana Medical System Inc.). All sections were scanned using a VS-110 microscope with a 20× 0,75NA objective and a resolution of 0,3225 µm (Olympus). Images were

analyzed with the OlyVIA software (Olympus). The intensity of staining in epithelial cells was assessed based on the following scale: negative or very weak (0), weak (1+), intermediate (2+) and elevated (3+). Final values for each core were calculated as the average of the scores determined by two independent blinded scorers.

### Immunohistochemistry (IHC) of mouse prostates

Four-micrometer sections were used for H&E staining and IHC. For IHC, slides were heated for 20 minutes at 60°C, deparaffinized in xylenes and rehydrated in ethanol gradient. Antigen retrieval was performed using sodium citrate pH 6.0 (p-AKT) or EDTA pH 8.0 (PRR) buffer in a pressure cooker (Cuisinart). Endogenous peroxidase was deactivated with 3% H<sub>2</sub>O<sub>2</sub>, and slides were blocked using a protein blocking reagent (Dako) at room temperature. Tissue sections were incubated with primary antibodies overnight at 4° C (PRR: Gene Tex, 1:50 000; p-AKT: Cell signaling, 1:50) and then with their respective biotin-conjugated secondary antibodies (Santa-Cruz). Staining was developed using DAB (Sigma-Aldrich) containing 0.015% H<sub>2</sub>O<sub>2</sub>. Counterstaining was performed with hematoxylin.

### Lysotracker image processing

Using a Zeiss microscope with 20X objective and an AxioCam HR camera, four to six images were taken from each well. *Image J* software was used to process the images. Cells on the bright-field images were manually counted using the *Image J* cell counter plugin. The mean gray value of images was then measured using the same software. Mean gray values were added and divided by the total number of cells counted from the corresponding bright-field images to find the mean gray value per cell.

### Tumor tissue sample preparation

The dissected tissues were frozen at -20° C with OCT compound (Tissue-Tek; Miles Scientific), and 5-µm slices were cut and immediately fixed in formalin to perform H&E staining for pathological examination. Tumor zones were delimited together with the adjacent non-cancerous tissues by a clinical pathologist, and further dissections were performed accordingly on the

frozen tissues to isolate tumor regions. To prepare tissue lysates, frozen tissues were washed with nano-pure RNase-free water (Wisent) to remove all apparent traces of OCT compound. The tissues were then finely grinded in liquid nitrogen and lysed in RIPA buffer (50 mM Tris, 150 mM NaCl, 0.1% SDS, 0.5% sodium deoxycholate, 1% Triton-X-100 and 1% NP40) with freshly added protease inhibitors (Complete Mini, Roche). Samples were incubated for 20 minutes on ice and vortexed every 10 minutes before being clarified by centrifugation (17,000 × g, 4° C, 30 minutes). Protein concentrations were determined using the Bicinchoninic Acid assay (Pierce).

### **TCGA prostate cancer mRNA levels.**

To evaluate the clinical relevance between *PRR/ATP6AP2* gene expression and clinical Gleason score, we included the annotated TCGA samples Gleason-6 ( $n = 49$ ),

Gleason-7 ( $n = 276$ ), Gleason-8 ( $n = 63$ ), Gleason-9 ( $n = 129$ ) and Gleason-10 ( $n = 3$ ) but excluded samples Gleason-N/A ( $n = 28$ ). Mean Centered *PRR/ATP6AP2* log<sub>2</sub> transformed data were filtered based on log<sub>2</sub> ratio differences greater than 2. Significance was determined by Wilcoxon rank *T*-test ( $P < 0.05$ ). The R console (version R 3.3.2), Bioconductor source (<http://bioconductor.org>) and TIGR MultiExperiment Viewer software package MeV version 4.8.1 [1] were used to perform microarray data analysis.

### **REFERENCE**

1. Saeed AI, Bhagabati NK, Braisted JC, Liang W, Sharov V, Howe EA, Li J, Thiagarajan M, White JA, Quackenbush J. TM4 microarray software suite. *Methods Enzymol.* 2006; 411:134–93. [https://doi.org/10.1016/S0076-6879\(06\)11009-5](https://doi.org/10.1016/S0076-6879(06)11009-5). [PubMed]

**Supplementary Table 1: Clinical parameters of the Centre Hospitalier de l'Université de Montréal TMA patient cohort**

| TMA Series                             |                              | TF123 |
|----------------------------------------|------------------------------|-------|
| Number of patients                     |                              | 285   |
| Age at Diagnosis<br>(years)            | Mean                         | 62    |
|                                        | Median                       | 63    |
|                                        | 25                           | 59    |
|                                        | Percentile 50                | 63    |
|                                        | 75                           | 67    |
| Follow-up<br>(months)                  | Mean                         | 128   |
|                                        | Median                       | 129   |
|                                        | 25                           | 76    |
|                                        | Percentile 50                | 129   |
|                                        | 75                           | 174   |
| Biochemical Relapse                    | No                           | 169   |
|                                        | Yes                          | 116   |
| Biochemical Relapse Type               | 0.2 and Rising               | 74    |
|                                        | Failed Radical Prostatectomy | 42    |
| Bone Metastasis                        | No                           | 258   |
|                                        | Yes                          | 27    |
| Castrate Resistant                     | No                           | 258   |
|                                        | Yes                          | 27    |
| Death                                  | PCa specific                 | 19    |
|                                        | Other cause                  | 30    |
|                                        | Overall                      | 49    |
|                                        | ≤3+3                         | 138   |
|                                        | 3+4                          | 94    |
| Gleason Score Radical<br>Prostatectomy | 4+3                          | 19    |
|                                        | ≥4+4                         | 29    |
|                                        | Unknown                      | 5     |
|                                        | 2                            | 64    |
|                                        | 2a                           | 40    |
| pTNM                                   | 2b                           | 52    |
|                                        | 2c                           | 49    |
|                                        | 3a                           | 50    |
|                                        | 3b                           | 22    |
|                                        | 3c                           | 8     |
|                                        | No                           | 196   |
|                                        | Yes                          | 9     |
| Lymph Node Invasion                    | Unknown                      | 80    |
|                                        | No                           | 205   |
| Capsular Penetration                   | Yes                          | 80    |
|                                        | No                           | 269   |
| Seminal Gland Invasion                 | Yes                          | 16    |
|                                        | Negative                     | 185   |
| Margin status                          | Positive                     | 95    |
|                                        | Unknown                      | 5     |

**Supplementary Table 2: Correlation values of p-Akt staining with Biochemical Recurrence (BCR), pre-operative PSA levels, and surgical margins status (SMS) on TMA analysis**

| Clinico-pathological parameter |                         | BCR     | Pre-op PSA | SMS    |
|--------------------------------|-------------------------|---------|------------|--------|
| p-Akt                          | Correlation Coefficient | 0.193** | 0.144*     | 0.141* |
| Spearman's rho                 | Sig. (2-tailed)         | 0.001   | 0.016      | 0.02   |
| correlation                    | N                       | 280     | 280        | 275    |

**Supplementary Table 3: Clinical parameters of patients from Centre Hospitalier Universitaire de Sherbrooke sampled for normal adjacent and tumor tissues**

| Patient number | Biobanking (REF) | Gleason Score | PSA at Diagnosis | Prostate weight (g) | Extra-prostatic extension* | Invaded Seminal Vesicles* | pT   | pN | pM | Margins** | Biochemical recurrence*** | Metastasis**** |
|----------------|------------------|---------------|------------------|---------------------|----------------------------|---------------------------|------|----|----|-----------|---------------------------|----------------|
| 46             | -110             | 3+3           | 3.6              | 126                 | 0                          | 0                         | pT2c | 0  | x  | 0         | 0                         | 0              |
| 48             | -152             | 4+3           | 9                | 46                  | 1                          | 0                         | pT3b | x  | x  | 0         | 1                         | 0              |
| 57             |                  | 3+3           | 6.6              |                     |                            |                           |      |    |    |           |                           |                |
| 72             | -149             | 4+3           | 7.45             | 56                  | 1                          | 1                         | pT3b | 0  | X  | 0         | 1                         | 2              |
| 83             | -103             | 3+4           | 2.9              | 34                  | 0                          | 0                         | pT2c | x  | x  | 0         | 0                         | 0              |
| 84             | -98              | 4+3           | 9.1              | 84                  | 0                          | 0                         | pT2c | x  | x  | 0         | 1                         | 0              |
| 86             |                  | 3+4           | 15.2             |                     |                            |                           |      |    |    |           |                           |                |
| 97             | -97              | 3+4           | 18.4             | 54                  | 0                          | 0                         | pT2b | 0  | x  | 2         | 0                         | 0              |
| 105            | -96              | 3+3           | 9.7              | 116                 | 0                          | 0                         | pT2b | x  | x  | 1         | 0                         | 0              |
| 109            | -95              | 4+3           | 5.7              | 66                  | 0                          | 0                         | pT2c | x  | x  | 0         | 0                         | 0              |
| 113            | -143             | 3+3           | 5.6              | 42                  | 0                          | 0                         | pT2b | x  | x  | 0         | 1                         | 0              |
| 120            | -90              | 3+3           | 7.2              | 36                  | 0                          | 0                         | PT2a | x  | x  | 1         | 0                         | 0              |
| 136            | -137             | 3+4           | 12               | 40                  | N/A                        | 0                         | pT2a | 0  | x  | 1         | 1                         | 0              |
| 137            | -79              | 4+3           | 4.5              | 28                  | 1                          | 0                         | pT3  | x  | x  | 0         | 0                         | 0              |
| 154            | -73              | 4+3           | 6.7              | 42                  | 1                          | 0                         | pT3a | x  | x  | 2         | 0                         | 0              |
| 158            | -129             | 3+4           | 36.5             | 75                  | 1                          | 0                         | pT3a | 1  | x  | 0         | 1                         | 0              |
| 179            | -55              | 3+3           | 4.4              | 50                  | 0                          | 0                         | pT2c | x  | x  | 0         | 0                         | 0              |
| 180            | -54              | 4+3           | 5.32             | 40                  | 1                          | 1                         | pT3b | x  | x  | 2         | 0                         | 0              |
| 194            | -123             | 3+4           | 3.46             | 34                  | 0                          | 0                         | pT2c | x  | x  | 0         | 1                         | 0              |
| 195            | -122             | 3+4           | 9.6              | 102                 | 0                          | 0                         | pT2c | x  | x  | 1         | 1                         | 0              |

\*0 = No, 1 = Yes, \*\*0: Negative, 1: Unifocal, 2: Multifocal, \*\*\*1: yes if > 0.2 ng/mL, 0: no, \*\*\*\*0: None, 1: Lymph node, 2: bones, 3: visceral.

**Supplementary Table 4: Clinical parameters of patients from the Centre Hospitalier Universitaire de Sherbrooke sampled for plasma and urine ELISA**

| Plasma specimens                    |                              |     |
|-------------------------------------|------------------------------|-----|
| Number of patients                  |                              | 155 |
| Age at Diagnosis (years)            | Mean                         | 62  |
|                                     | Median                       | 62  |
|                                     | Percentile 25                | 58  |
|                                     | Percentile 50                | 62  |
|                                     | Percentile 75                | 66  |
| Follow-up (Months)                  | Mean                         | 117 |
|                                     | Median                       | 124 |
|                                     | Percentile 25                | 65  |
|                                     | Percentile 50                | 124 |
|                                     | Percentile 75                | 168 |
| Biochemical Relapse                 | No                           | 106 |
|                                     | Yes                          | 49  |
| Biochemical Relapse Type            | 0.2 and Rising               | 29  |
|                                     | Failed Radical Prostatectomy | 20  |
| Bone Metastasis                     | No                           | 137 |
|                                     | Yes                          | 18  |
| Castrate Resistant                  | No                           | 138 |
|                                     | Yes                          | 17  |
| Death                               | Prostate cancer specific     | 13  |
|                                     | Other cause                  | 12  |
|                                     | Overall                      | 25  |
|                                     | ≤3+3                         | 78  |
| Gleason Score Radical Prostatectomy | 3+4                          | 50  |
|                                     | 4+3                          | 11  |
|                                     | ≥4+4                         | 13  |
|                                     | Unknown                      | 3   |
|                                     | 2                            | 44  |
| pTNM                                | 2a                           | 18  |
|                                     | 2b                           | 34  |
|                                     | 2c                           | 14  |
|                                     | 3a                           | 26  |
|                                     | 3b                           | 15  |
|                                     | 3c                           | 4   |
|                                     | Unknown                      | 44  |
| Lymph Node Invasion                 | No                           | 106 |
|                                     | Yes                          | 5   |
|                                     | Unknown                      | 44  |
| Capsular Penetration                | No                           | 110 |
|                                     | Yes                          | 45  |
| Seminal Gland Invasion              | No                           | 146 |
|                                     | Yes                          | 9   |
| Margin status                       | Negative                     | 99  |
|                                     | Positive                     | 53  |
|                                     | Unknown                      | 3   |

**Supplementary Table 5: RT-PCR primer sequences**

| <b>Gene</b>                                                        | <b>Primer name</b> | <b>Sequence (5'-3')</b>   |
|--------------------------------------------------------------------|--------------------|---------------------------|
| Insulin-like growth factor binding protein 2                       | <i>IGFBP2</i> Fwd  | GGAGGAGCCCAAGAAGCTGCG     |
| Insulin-like growth factor binding protein 2                       | <i>IGFBP2</i> Rev  | CCCGTTCAGAGACATCTTGCACTG  |
| ATPase, H <sup>+</sup> transporting, lysosomal accessory protein 2 | <i>HT028</i> Fwd   | GACACCTCCCTCATTAGGAAGAC   |
| ATPase, H <sup>+</sup> transporting, lysosomal accessory protein 2 | <i>HT028</i> Rev   | GATCATTATCCAAAGTACCATGTTG |
| Calsyntenin 1 (CLSTN1)                                             | <i>CLSTN2</i> Fwd  | GGAACACCGCTCCTTTGTTGACCTG |
| Calsyntenin 1 (CLSTN1)                                             | <i>CLSTN2</i> Rev  | CCGCATGGTCCGCCGATGTG      |
| Vinculin                                                           | <i>VCL2</i> Fwd    | CTACTAGGCAAAATGAGAGGGCGAC |
| Vinculin                                                           | <i>VCL2</i> Rev    | GAAGGAAGGATGTTCAAGCAAGG   |
| Phosphatase and Tensin homolog                                     | <i>PTENa</i> FWD   | CAAGTTCATGTACTTTGAGTTCCC  |
| Phosphatase and Tensin homolog                                     | <i>PTENa</i> REV   | GCACGCTCTATACTGCAAATGC    |
| Protein tyrosine phosphatase, receptor type, F                     | <i>LAR</i> Fwd     | ACGCTCTGCCAACTACACC       |
| Protein tyrosine phosphatase, receptor type, F                     | <i>LAR</i> Rev     | CACAAGATCAATCGGAGGCTT     |
| Desmoglein 2                                                       | <i>DSG2</i> Fwd    | TGATGCTGCTGCTTAGGTGCC     |
| Desmoglein 2                                                       | <i>DSG2</i> Rev    | CCTGGGTTGCTTTACTGGACGGC   |
| Chaperonin containing TCP1, subunit 8 (theta)                      | <i>CCT8</i> Fwd    | AGGAGGGAGCGAAACACTTTT     |
| Chaperonin containing TCP1, subunit 8 (theta)                      | <i>CCT8</i> Rev    | GCAGGATGCTGTACTTCTAGTTC   |
| Ribonuclease/Angiogenin Inhibitor 1                                | <i>RNHI</i> Fwd    | CCTGCTGCTGCTCTCCCTGG      |
| Ribonuclease/Angiogenin Inhibitor 1                                | <i>RNHI</i> Rev    | GGCAGAAATAAGCGGATCTGAGCGT |
| Spondin 2                                                          | <i>SPO2</i> Fwd    | GAGGGCACAGGGGGTTTCGC      |
| Spondin 2                                                          | <i>SPO2</i> Rev    | AGAGCAGACGGGACACGGGG      |
| Prostate specific antigen precursor                                | <i>PSA</i> Fwd     | TGAACCATGTGCCCTGCCCG      |
| Prostate specific antigen precursor                                | <i>PSA</i> Rev     | AGGGGTGCTCAGGGGTTGGC      |
| Cystatin C                                                         | <i>CST3</i> Fwd    | TGCGGCGTGCCTGGACTTT       |
| Cystatin C                                                         | <i>CST3</i> Rev    | GCTACGATCTGCTTGCGGGCG     |
| Alpha-1 collagen VI                                                | <i>COL6A1</i> Fwd  | ACACCGACTGCGCTATCAAG      |
| Alpha-1 collagen VI                                                | <i>COL6A1</i> Rev  | CACCGAGAAGACTTTGACGC      |
| Alpha actinin 4                                                    | <i>ACTN4</i> Fwd   | TGGAGGTCATATCAGGGGAGC     |
| Alpha actinin 4                                                    | <i>ACTN4</i> Rev   | CTTCTGCCCCGATGGAGAC       |
| Glyceraldehyde-3-phosphate dehydrogenase                           | <i>GAPDH</i> Fwd   | AGGGCTGCTTTTAACTCTGGT     |
| Glyceraldehyde-3-phosphate dehydrogenase                           | <i>GAPDH</i> Rev   | CCCCACTTGATTTTGGAGGGA     |

**Supplementary Table 6: PRR shRNA and siRNA sequences**

| PRR shRNA/siRNA | Name               | Sequence (5'-3')                                                  |
|-----------------|--------------------|-------------------------------------------------------------------|
| shRNA 1         | TRCN0000038605     | CCGGGCAGTGTCATTTTCGTACCCCTTCTCGAGAAGGGTACGA<br>AATGACACTGCTTTTTTG |
| shRNA 2         | TRCN0000308100     | CCGGAGTCTTGACAGTGTTGCAAATCTCGAGATTTGCAACA<br>CTGTCAAGACTTTTTTG    |
| shRNA 3         | TRCN0000289297     | CCGGCCTGGATATGATAGCATCATTCTCGAGAATGATGCTATC<br>ATATCCAGGTTTTTG    |
| siRNA 1         | SASI_Hs01_00147063 | GAGUGUAUAUGGUAGGGAA                                               |
| siRNA 2         | SASI_Hs01_00147062 | GUCUUGACAGUGUUGCAA                                                |

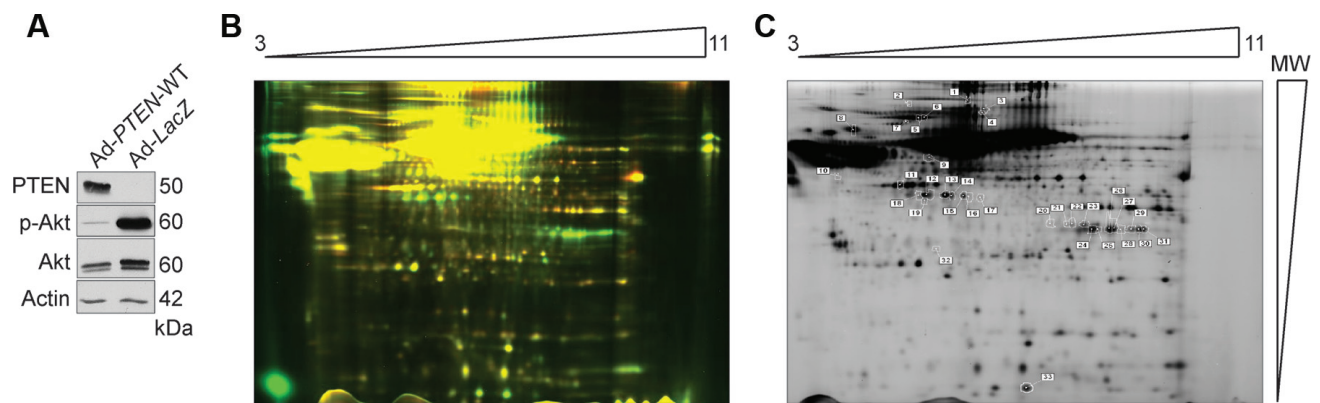

**Supplementary Figure 1: Identification of secreted factors regulated by PTEN.** (A) Western blot analysis demonstrating PTEN expression and p-Akt downregulation in the presence of PTEN in whole cell extracts of Ad-PTEN WT infected LNCaP cells compared to Ad-LacZ infected controls. Total Akt was used as a control for p-Akt levels and Actin was used as a loading control. (B) Representative scan of a 2D-DiGE gel where proteins isolated from conditioned media of LNCaP cells infected with wild type PTEN Adenovirus (Ad-PTEN WT) were labelled with Cy5 dye (red), and proteins from cells infected with LacZ Adenovirus (Ad-LacZ) labelled with Cy3 dye (green). (C) Representative silver stained gel labelled for spots identified by mass spectrometry.

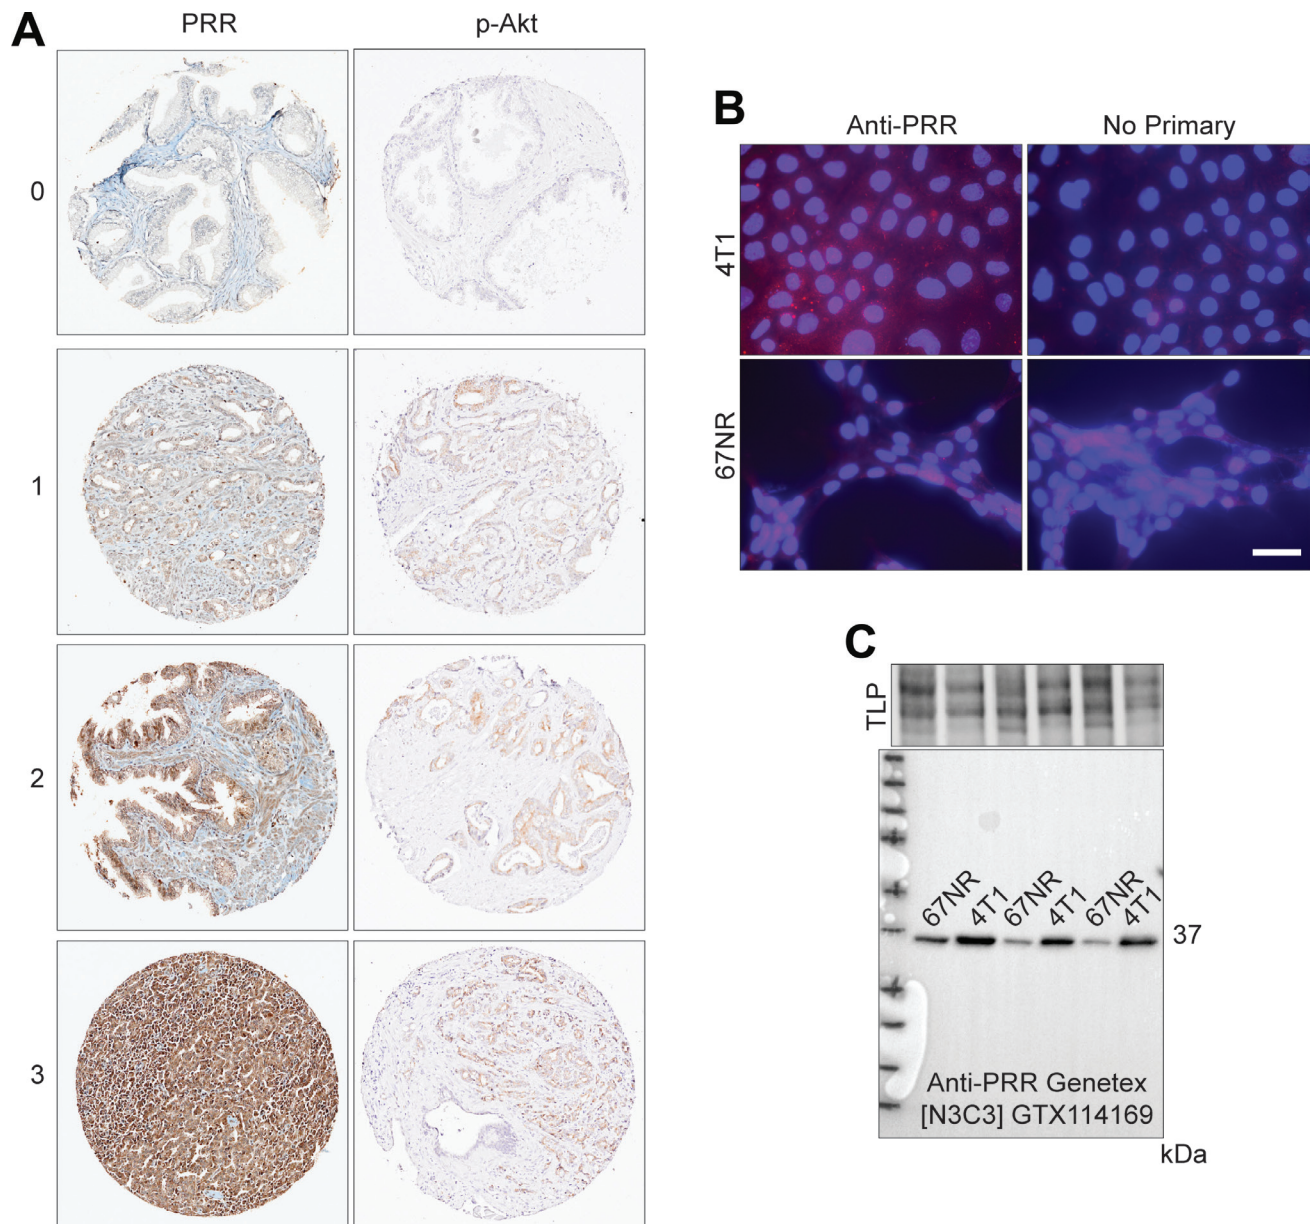

**Supplementary Figure 2: PRR and p-Akt TMA scoring and PRR antibody TMA validation.** (A) Representative scoring of immunohistochemistry staining intensities for p-Akt and PRR in prostate cancer TMAs. (B) Immunofluorescence images (20×) of murine breast cancer cells 4T1 (High PRR expression) and 67NR (Low PRR expression) stained with the anti-PRR antibody used in TMA staining (Genetex [N3C3] GTX114169) or No primary antibody for control. Scale bar measures 50  $\mu$ m. (C) Western blot analysis demonstrating the band level of PRR expression and the specificity of the antibody used to detect PRR in 3 replicates of 67NR and 4T1 cell lines. Total lane protein was used as a loading control.



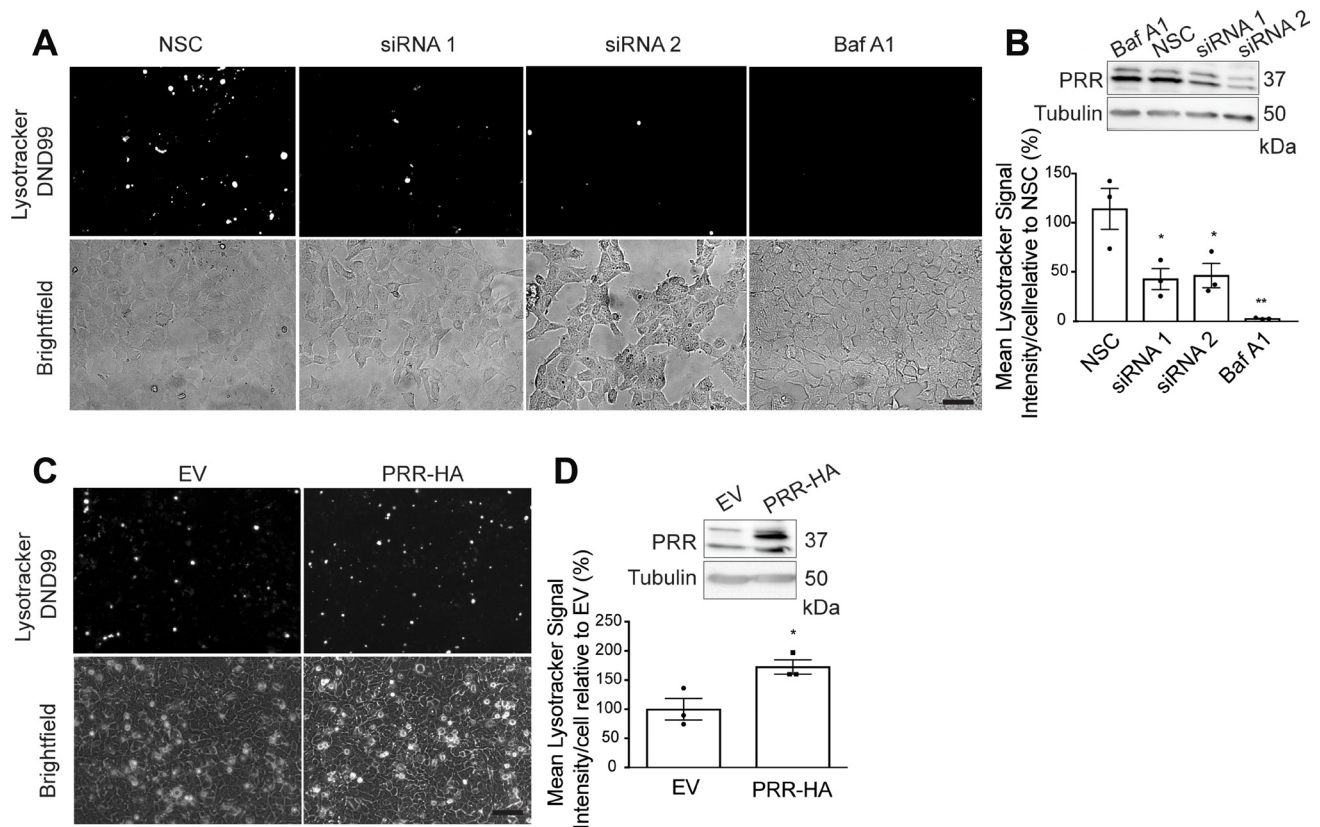

**Supplementary Figure 3: PRR expression affects cell growth and V-ATPase activity in HEK 293T cells.** (A) LysoTracker DND-99 and corresponding brightfield images (20X) of Non-Silencing siRNA (NSC) (50 nM) transfected, PRR siRNA 1 or siRNA 2 (50 nM) transfected, or Bafilomycin A1 (Baf A1) (100 nM) treated HEK-293T cells. (B) Quantification of Mean LysoTracker signal per cell shows a decrease in LysoTracker signal after knocking down PRR using siRNA 1 ( $*P = 0.036$ ), siRNA 2 ( $*P = 0.049$ ), or after Bafilomycin A1 (100 nM) ( $**P = 0.0028$ ) treatment in HEK-293T cells ( $n = 4$ ). Western blot analysis validating PRR knockdown in siRNA1 and siRNA 2 transfected cells. Tubulin was used as a loading control (Top Panel). (C) LysoTracker DND-99 and corresponding brightfield images (20X) of empty vector (EV) and PRR-HA transfected HEK 293T cells. (D) Corresponding Quantification of Mean LysoTracker signal per cell demonstrates an increase in LysoTracker signal in PRR-HA transfected ( $*P = 0.031$ ) HEK-293T cells ( $n = 3$ ). Western blot analysis validating PRR overexpression in HEK293T cells following PRR-HA transfection. Tubulin was used as a loading control (Top Panel). Scale bar measures 100  $\mu\text{m}$ . Data are presented as the mean  $\pm$  SEM. Statistical tests conducted using Student's  $t$  test.
